# Supplementary material for: Availability, Prices and Affordability of Antibiotics Stocked by Informal Providers in Rural India: A Cross-Sectional Survey
Source: MDPI journal article supplement (doi:10.3390/antibiotics11040523), 2022-04-14
Supplement: s1 [file s1]

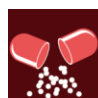*Supplementary Table S1: IPs' health-related certification, by level of education*

| Education (School and college) | No certification | Pharmacy certification | Laboratory assistant's certification | Certification in basic primary healthcare courses* |
|--------------------------------|------------------|------------------------|--------------------------------------|----------------------------------------------------|
| Up to Class 10 (n= 66)         | 38%              | 11%                    | 1%                                   | 50%                                                |
| Class 11-12 (n= 61)            | 18%              | 10%                    | 0%                                   | 72%                                                |
| Graduate/postgraduate (n=69)   | 26%              | 7%                     | 1%                                   | 65%                                                |
| Total (n=196)                  | 28%              | 9%                     | 1%                                   | 62%                                                |

\*Examples: 'Community Medical Service', 'Rural Medical Practitioner', 'Alternative Medicine', 'Basic Allopathic Medicine', 'Indo-allopathic Medicine'.

*Supplementary Table S2: Antibiotic formulations stocked by IPs with any antibiotic in stock on the day of the visit (n=196)*

| Antibiotics                                                                 | All forms | Tablets       | Syrups/suspensions /drops | Injections   |
|-----------------------------------------------------------------------------|-----------|---------------|---------------------------|--------------|
| Any antibiotics in stock                                                    |           | 165/196 (84%) | 146/196 (74%)             | 36/196 (18%) |
| Median number of different antibiotics (by active ingredient) stocked (IQR) | 3 (2-5)   | 2 (1-3)       | 1 (0-2)                   | 0 (0-0)      |
| Median number of different ATC* classes stocked (IQR)                       | 2 (2-3)   | 2 (1-2)       | 1 (0-2)                   | 0 (0-0)      |

\* Anatomical Therapeutic Chemical classification system (WHO, 2021)

IQR= Interquartile range

Supplementary Figure S1: Percentage of IPs stocking different types of antibiotics by active ingredient and formulation

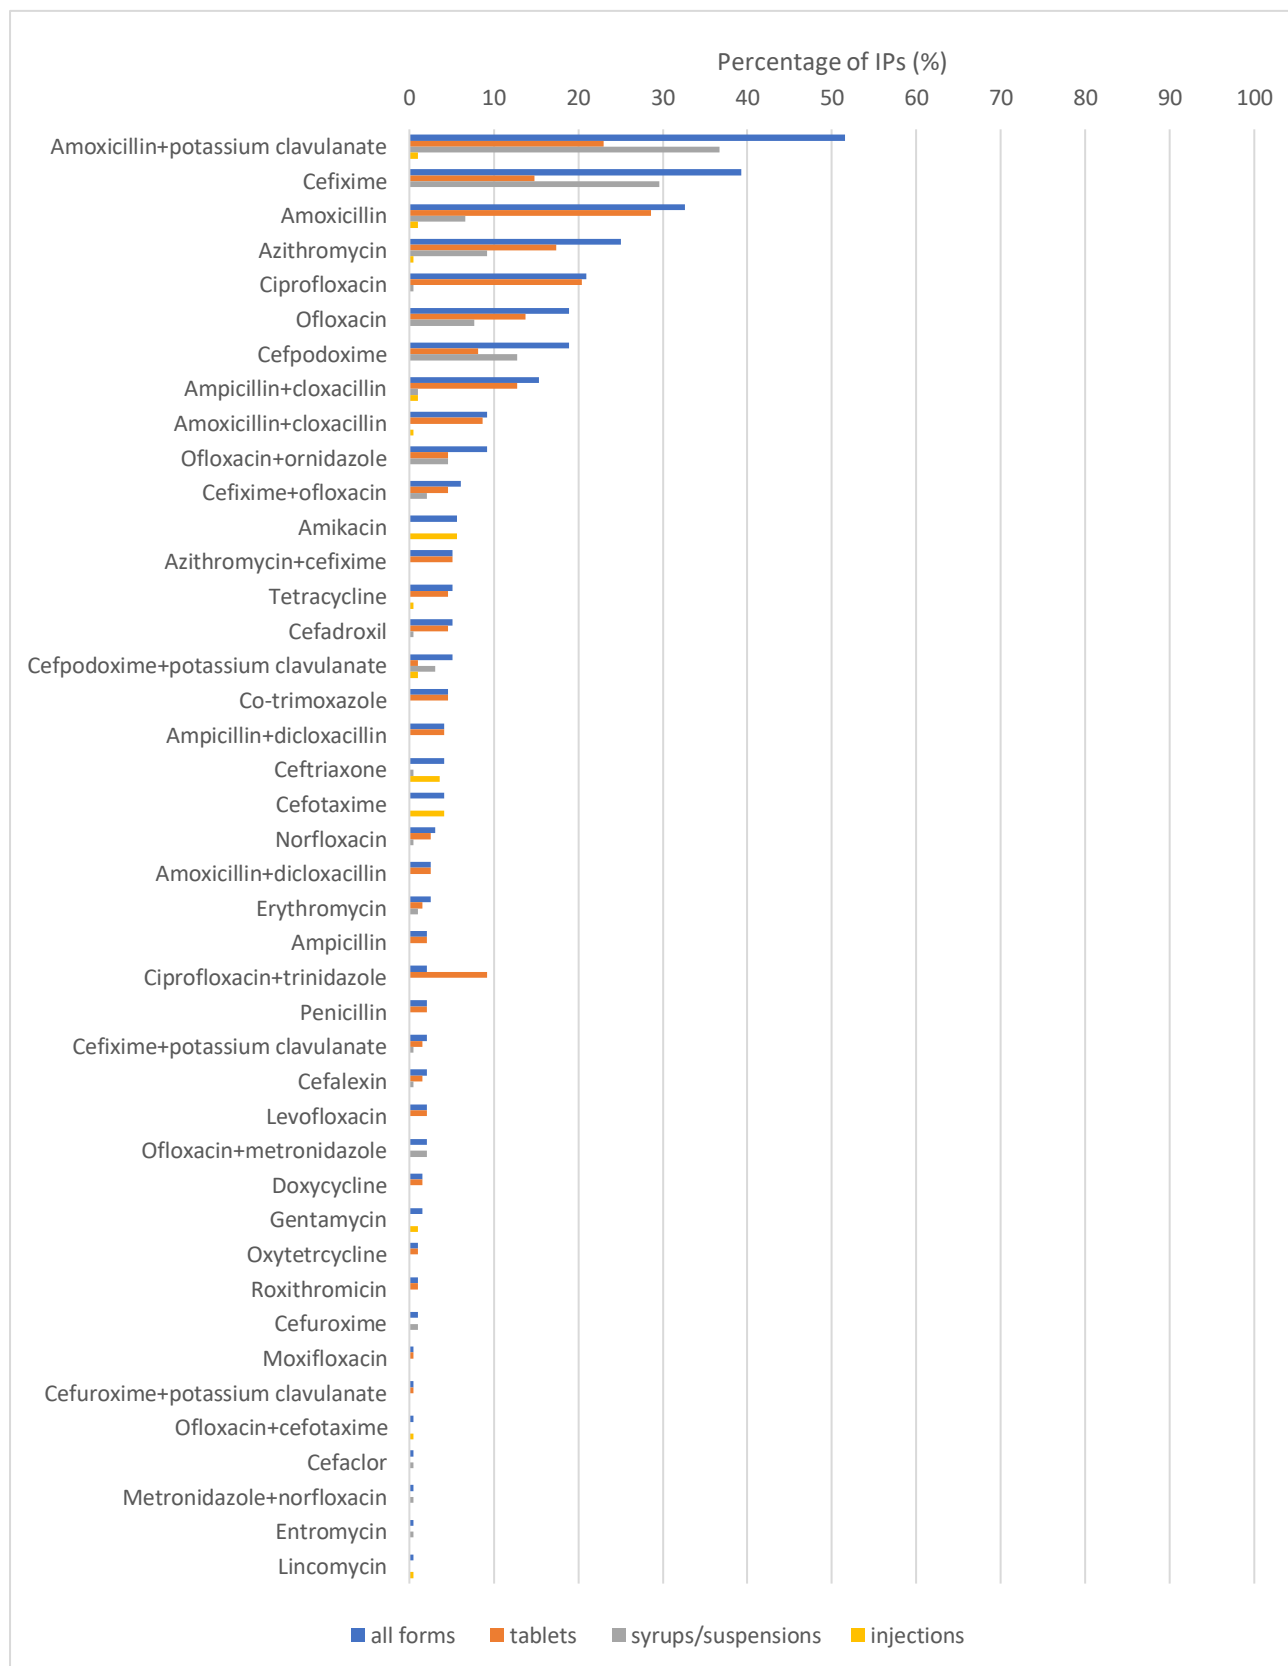

Supplementary Table S3: Antibiotics stocked by IPs by WHO classifications &amp; Indian regulations

| Antibiotic                          | WHO classifications |       |                 | Indian Drugs & Cosmetics Act |        |
|-------------------------------------|---------------------|-------|-----------------|------------------------------|--------|
|                                     | ACCESS              | WATCH | Not recommended | Schedule H1*                 | Banned |
| Amoxicillin potassium clavulanate   |                     |       |                 |                              |        |
| Cefixime                            |                     |       |                 |                              |        |
| Amoxicillin                         |                     |       |                 |                              |        |
| Azithromycin                        |                     |       |                 |                              |        |
| Ciprofloxacin                       |                     |       |                 |                              |        |
| Ofloxacin                           |                     |       |                 |                              |        |
| Cefpodoxime                         |                     |       |                 |                              |        |
| Ampicillin + cloxacillin            |                     |       |                 |                              |        |
| Amoxicillin + cloxacillin           |                     |       |                 |                              |        |
| Ofloxacin + ornidazole              |                     |       |                 |                              |        |
| Cefixime + ofloxacin                |                     |       |                 |                              |        |
| Amikacin                            |                     |       |                 |                              |        |
| Azithromycin + cefixime             |                     |       |                 |                              |        |
| Tetracycline                        |                     |       |                 |                              |        |
| Cefadroxil                          |                     |       |                 |                              |        |
| Cefpodoxime + potassium clavulanate |                     |       |                 |                              |        |
| Co-trimoxazole                      |                     |       |                 |                              |        |
| Ampicillin + dicloxacillin          |                     |       |                 |                              |        |
| Ceftriaxone                         |                     |       |                 |                              |        |
| Cefotaxime                          |                     |       |                 |                              |        |
| Norfloxacin                         |                     |       |                 |                              |        |
| Amoxicillin + dicloxacillin         |                     |       |                 |                              |        |
| Erythromycin                        |                     |       |                 |                              |        |
| Ampicillin                          |                     |       |                 |                              |        |
| Ciprofloxacin + tinidazole          |                     |       |                 |                              |        |
| Penicillin                          |                     |       |                 |                              |        |
| Cefixime + clavulanic acid          |                     |       |                 |                              |        |
| Cefalexin                           |                     |       |                 |                              |        |
| Levofloxacin                        |                     |       |                 |                              |        |
| Ofloxacin + metronidazole           |                     |       |                 |                              |        |
| Doxycycline                         |                     |       |                 |                              |        |
| Gentamycin                          |                     |       |                 |                              |        |
| Oxytetracycline                     |                     |       |                 |                              |        |
| Roxithromycin                       |                     |       |                 |                              |        |
| Cefuroxime                          |                     |       |                 |                              |        |
| Moxifloxacin                        |                     |       |                 |                              |        |
| Cefuroxime potassium clavulanate    |                     |       |                 |                              |        |
| Ofloxacin + cefotaxime**            |                     |       |                 |                              |        |
| Cefaclor                            |                     |       |                 |                              |        |
| Metronidazole + norfloxacin         |                     |       |                 |                              |        |
| Enteromycin (chloramphenicol)       |                     |       |                 |                              |        |
| Lincomycin                          |                     |       |                 |                              |        |

\* This Schedule contains a restricted set of 46 prescription drugs including third and fourth generation cephalosporins, carbapenems, newer fluoroquinolones and first- and second-line antitubercular drugs. Sales of Schedule H1 drugs are more strictly monitored than of Schedule H drugs (GOI, 2016a).

\*\*A combination of two WATCH antibiotics but not listed in the 'Not Recommended' or 'Banned' products.
